# Supplementary material for: Fe-S Protein Synthesis in Green Algae Mitochondria
Source: MDPI journal article supplement (doi:10.3390/plants10020200), 2021-01-21
Supplement: s1 [file s1]

## Supplementary data

### Bioinformatic Analysis

The sequence similarity searches were carried out using BLASTP against the NCBI nonredundant database ([www.ncbi.nlm.nih.gov](http://www.ncbi.nlm.nih.gov)), UniProtKB database ([www.uniprot.org](http://www.uniprot.org)) and Phytozome database (<https://phytozome.jgi.doe.gov/pz/portal.html>) using *A. thaliana* and *Chlamydomonas* Fe-S proteins sequences as query, as described in each case.

The selected sequences were aligned with Clustal Omega ([www.ebi.ac.uk/Tools/msa/clustalo/](http://www.ebi.ac.uk/Tools/msa/clustalo/)). Secondary structure prediction was achieved with the servers NetSurfP-2.0 ([www.cbs.dtu.dk/services/NetSurfP/](http://www.cbs.dtu.dk/services/NetSurfP/)) and CD-Search ([www.ncbi.nlm.nih.gov/Structure/cdd/wrpsb.cgi](http://www.ncbi.nlm.nih.gov/Structure/cdd/wrpsb.cgi)). Intracellular location was predicted using the Depp-Loc1.0 server ([www.cbs.dtu.dk/services/DeepLoc/](http://www.cbs.dtu.dk/services/DeepLoc/)).
